# Supplementary material for: Genomic and Phenotypic Characterization of Clostridium botulinum Isolates from an Infant Botulism Case Suggests Adaptation Signatures to the Gut
Source: PubMed Central journal article supplement (PMC9239077; doi:10.1128/mbio.02384-21), 2022-05-02

## Data file S1. SNP, InDels and structural variant calling and filtering

### Part A. Workflow, accession numbers and read mapping statistics

The data were deposited in NCBI under the project number PRJNA610151.

#### Workflow

##### i. Import reads

*Version: CLC Genomics Workbench 11.0.1*  
*Discard read names = No*  
*Discard quality scores = No*  
*Paired orientation = Paired reads (forward-reverse)*  
*Minimum distance = 1*  
*Maximum distance = 1000*  
*Quality score = NCBI/Sanger or Illumina Pipeline 1.8 and later*  
*Remove failed reads = Yes*  
*MiSeq de-multiplexing = No*  
*Join reads from different lanes = No*

##### ii. Trim reads

*Version: CLC Genomics Workbench 11.0.1*  
*Quality trim = Yes*  
*Quality limit = 0.05*  
*Ambiguous trim = Yes*  
*Ambiguous limit = 2*  
*Automatic read-through adapter trimming = Yes*  
*Remove 5' terminal nucleotides = Yes*  
*Number of 5' terminal nucleotides = 20*  
*Remove 3' terminal nucleotides = No*

*Discard short reads = No*  
*Discard long reads = No*  
*Save discarded sequences = No*  
*Save broken pairs = No*  
*Create report = Yes*

##### iii. Map Reads to Reference - Parameters:

*Version: CLC Genomics Workbench 11.0.1*  
*References = plasmid, chromosome*  
*Masking mode = No masking*  
*Match score = 1*  
*Mismatch cost = 2*  
*Cost of insertions and deletions = Linear gap cost*  
*Insertion cost = 3*  
*Deletion cost = 3*  
*Length fraction = 0.5*  
*Similarity fraction = 0.8*  
*Global alignment = No*  
*Auto-detect paired distances = Yes*  
*Non-specific match handling = Map randomly*  
*Output mode = Create stand-alone read mappings*  
*Create report = Yes*  
*Collect un-mapped reads = Yes*

## Accession numbers and read mapping statistics

| Sample | Origin | BioSample number | Sequence read archive (SRA) | Total reads | Mapped reads | Unmapped reads | % mapped reads | % unmapped reads | Average mapping coverage | % positions with less than 50 X coverage | % positions with 0-9 X coverage | Number of positions with 0-9 X coverage |
|--------|--------|------------------|-----------------------------|-------------|--------------|----------------|----------------|------------------|--------------------------|------------------------------------------|---------------------------------|-----------------------------------------|
| H4     | Dust   | SAMN14278149     | SRR11249086                 | 12,821,964  | 12,802,130   | 19,834         | 99.85%         | 0.15%            | 260.98                   | 0.05                                     | 0.002                           | 89                                      |
| H18    | Dust   | SAMN14278150     | SRR11249085                 | 12,277,424  | 12,244,591   | 32,833         | 99.73%         | 0.27%            | 249.65                   | 0.20                                     | 0.002                           | 87                                      |
| V41    | Dust   | SAMN14278151     | SRR11249074                 | 14,297,548  | 14,264,721   | 32,827         | 99.77%         | 0.23%            | 290.82                   | 0.02                                     | 0.002                           | 86                                      |
| V62    | Dust   | SAMN14278152     | SRR11249067                 | 12,396,848  | 12,369,354   | 27,494         | 99.78%         | 0.22%            | 251.45                   | 0.05                                     | 0.002                           | 90                                      |
| V134   | Dust   | SAMN14278153     | SRR11249066                 | 12,917,388  | 12,890,317   | 27,071         | 99.79%         | 0.21%            | 262.36                   | 0.15                                     | 0.002                           | 90                                      |
| V206   | Dust   | SAMN14278154     | SRR11249065                 | 15,095,730  | 15,056,711   | 39,019         | 99.74%         | 0.26%            | 306.92                   | <0.01                                    | 0.002                           | 89                                      |
| V1     | Dust   | SAMN14278155     | SRR11249064                 | 13,867,882  | 13,833,435   | 34,447         | 99.75%         | 0.25%            | 282.01                   | <0.01                                    | 0.002                           | 89                                      |
| V4     | Dust   | SAMN14278156     | SRR11249063                 | 14,601,868  | 14,561,491   | 40,377         | 99.72%         | 0.28%            | 296.87                   | 1.15                                     | 0.351                           | 13831                                   |
| V73    | Dust   | SAMN14278157     | SRR11249062                 | 11,413,298  | 11,218,179   | 195,119        | 98.29%         | 1.71%            | 229.69                   | 0.15                                     | 0.002                           | 94                                      |
| V174   | Dust   | SAMN14278158     | SRR11249061                 | 14,490,576  | 12,729,963   | 1,760,613      | 87.85%         | 12.15%           | 257.49                   | 10.80                                    | 10.416                          | 410225                                  |
| ST25   | Stool  | SAMN14278159     | SRR11249084                 | 8,450,202   | 8,433,729    | 16,473         | 99.81%         | 0.19%            | 172.65                   | 2.93                                     | 0.004                           | 146                                     |
| ST7B   | Stool  | SAMN14278160     | SRR11249083                 | 14,461,402  | 14,448,823   | 12,579         | 99.91%         | 0.09%            | 295.80                   | <0.01                                    | 0.002                           | 87                                      |
| ST19   | Stool  | SAMN14278161     | SRR11249082                 | 13,183,196  | 13,173,044   | 10,152         | 99.92%         | 0.08%            | 269.99                   | <0.01                                    | 0.002                           | 87                                      |
| ST4    | Stool  | SAMN14278162     | SRR11249081                 | 14,830,294  | 14,815,575   | 14,719         | 99.90%         | 0.10%            | 303.57                   | 0.08                                     | 0.002                           | 91                                      |
| ST7    | Stool  | SAMN14278163     | SRR11249080                 | 12,262,802  | 12,252,509   | 10,293         | 99.92%         | 0.08%            | 250.99                   | <0.01                                    | 0.002                           | 93                                      |
| ST21   | Stool  | SAMN14278164     | SRR11249079                 | 12,133,444  | 12,124,584   | 8,860          | 99.93%         | 0.07%            | 248.54                   | 0.04                                     | 0.002                           | 86                                      |
| ST29   | Stool  | SAMN14278165     | SRR11249078                 | 14,664,944  | 14,653,413   | 11,531         | 99.92%         | 0.08%            | 300.34                   | <0.01                                    | 0.002                           | 92                                      |
| ST31   | Stool  | SAMN14278166     | SRR11249077                 | 16,020,442  | 16,007,164   | 13,278         | 99.92%         | 0.08%            | 327.99                   | <0.01                                    | 0.002                           | 92                                      |
| ST32   | Stool  | SAMN14278167     | SRR11249076                 | 12,357,848  | 12,348,839   | 9,009          | 99.93%         | 0.07%            | 253.09                   | <0.01                                    | 0.002                           | 86                                      |
| ST33   | Stool  | SAMN14278168     | SRR11249075                 | 11,310,712  | 11,301,482   | 9,230          | 99.92%         | 0.08%            | 231.55                   | <0.01                                    | 0.002                           | 87                                      |
| ST34   | Stool  | SAMN14278169     | SRR11249073                 | 11,239,756  | 11,218,035   | 21,721         | 99.81%         | 0.19%            | 229.66                   | 1.22                                     | 0.003                           | 129                                     |
| ST39   | Stool  | SAMN14278170     | SRR11249072                 | 11,052,090  | 11,043,792   | 8,298          | 99.92%         | 0.08%            | 226.28                   | 0.02                                     | 0.002                           | 82                                      |
| ST40   | Stool  | SAMN14278171     | SRR11249071                 | 11,843,548  | 11,833,291   | 10,257         | 99.91%         | 0.09%            | 242.34                   | <0.01                                    | 0.002                           | 81                                      |
| ST41   | Stool  | SAMN14278172     | SRR11249070                 | 12,792,602  | 12,782,350   | 10,252         | 99.92%         | 0.08%            | 261.97                   | 0.01                                     | 0.002                           | 97                                      |
| ST43   | Stool  | SAMN14278173     | SRR11249069                 | 11,236,728  | 11,227,866   | 8,862          | 99.92%         | 0.08%            | 230.07                   | 0.35                                     | 0.002                           | 90                                      |
| ST44   | Stool  | SAMN14278174     | SRR11249068                 | 10,329,876  | 10,308,400   | 21,476         | 99.79%         | 0.21%            | 211.05                   | 0.13                                     | 0.002                           | 97                                      |

Remarks:

- *The isolate V4 is devoid of the 13-kb plasmid, hence the higher number of positions with no/low coverage, corresponding to the plasmid loss.*
- *The higher percentage (%) of unmapped reads in V73 reflects the presence of an additional phage inserted within the chromosome.*
- *The read mapping results of V174 against ST7B reference genome confirmed that V174 is a phylogenetically distinct isolate (strain) than all others associated with the infant botulism case, in line with our previous observations by Derman et al. (2014).*

## Part B. Basic variant detection and InDels and structural variants

### Basic variant detection

*Version: CLC Genomics Workbench 11.0.1*  
*Ploidy = 1*  
*Ignore positions with coverage above = 100,000*  
*Restrict calling to target regions = Not set*  
*Ignore broken pairs = Yes*  
*Ignore non-specific matches = Reads*  
*Minimum coverage = 10*  
*Minimum count = 2*  
*Minimum frequency (%) = 70.0*  
*Base quality filter = Yes*  
*Neighbourhood radius = 5*  
*Minimum central quality = 20*  
*Minimum neighbourhood quality = 15*  
*Read direction filter = No*  
*Relative read direction filter = Yes*  
*Significance (%) = 1.0*  
*Read position filter = No*  
*Remove pyro-error variants = No*  
*Create annotated table = Yes*

### InDels and Structural Variants

*Version: CLC Genomics Workbench 11.0.1*  
*P-Value threshold = 0.0001*  
*Maximum number of mismatches = 3*  
*Minimum quality score = 30*  
*Minimum relative consensus coverage = 0.7*  
*Filter variants = Yes*  
*Ignore broken pairs = Yes*  
*Restrict calling to target regions = Not set*  
*Create report = Yes*  
*Create breakpoints = Yes*  
*Create InDel variants Yes*  
*Create structural variations Yes*

### Additional filtering criteria for Indels and Structural Variants

*Breakpoint output: Fraction of non-perfectly mapped higher than 0.7*  
*InDel variant output: Variant ratio higher than 0.7*  
*Structural variant output: Variant ratio higher than 0.7*

InDels and Structural Variants were then manually curated, *i.e.* ambiguous regions, non-specific regions, low complexity or presence of inversion repeats.

Sanger sequencing: Regions of interest were amplified as per manufacturer's protocol using the HotStarTaq Master Mix Kit (Qiagen) and sent for Sanger sequencing to Macrogen, Inc. (South Korea). For each SNP are indicated the primer pair sequences. Oligonucleotide primers were ordered from Metabion GmbH (Germany).

# Part C. Summary table of SNP, InDels and other structural variants

| Coordinate  | SNP variants |    |     |     |     |      |      |    |     |      |      |      |     |      |      |      | DNA change | AA change | Locus tag | Predicted gene product | COG | COG categories | COG description |      |       |           |             |                                                                           |                                                              |      |                                                                  |    |
|-------------|--------------|----|-----|-----|-----|------|------|----|-----|------|------|------|-----|------|------|------|------------|-----------|-----------|------------------------|-----|----------------|-----------------|------|-------|-----------|-------------|---------------------------------------------------------------------------|--------------------------------------------------------------|------|------------------------------------------------------------------|----|
|             | V1           | V4 | V41 | V62 | V73 | V134 | VZ06 | H4 | H18 | ST25 | ST7B | ST19 | ST4 | ST71 | ST29 | ST31 |            |           |           |                        |     |                |                 | ST33 | ST34  | ST39      | ST40        | ST41                                                                      | ST43                                                         | ST44 |                                                                  |    |
| 48592-chr   | 0            | 0  | 0   | 0   | 0   | 0    | 0    | 0  | 0   | 0    | 0    | 0    | 0   | 0    | 0    | 0    | 0          | 0         | 0         | 0                      | 0   | 0              | 0               | 0    | 0     | T → C     | na          | -                                                                         | Intergenic region, upstream 30S ribosomal protein S10 (RpsJ) | na   | na                                                               | na |
| 57420-chr   | 0            | 0  | 0   | 0   | 0   | 0    | 0    | 0  | 0   | 0    | 0    | 0    | 0   | 0    | 0    | 0    | 0          | 0         | 0         | 0                      | 0   | 0              | 0               | 0    | G → A | Val11Met  | RpmD        | SOS ribosomal protein L30                                                 | COG1841                                                      | J    | Translational, ribosomal structure and biogenesis                |    |
| 127629-chr  | 0            | 0  | 0   | 0   | 0   | 0    | 0    | 0  | 0   | 0    | 0    | 0    | 0   | 0    | 0    | 0    | 0          | 0         | 0         | 0                      | 0   | 0              | 0               | 0    | G → A | Lys258fs  | GBE05_00715 | PDZ domain-containing protein                                             | COG2031                                                      | U    | Intracellular trafficking, secretion, and vesicular transport    |    |
| 247748-chr  | 0            | 0  | 0   | 0   | 0   | 0    | 0    | 0  | 0   | 0    | 0    | 0    | 0   | 0    | 0    | 0    | 0          | 0         | 0         | 0                      | 0   | 0              | 0               | 0    | G → T | silent    | GBE05_01200 | Pyruvate carboxylase                                                      | COG1038                                                      | C    | Energy production and conversion                                 |    |
| 284635-chr  | 0            | 0  | 0   | 0   | 0   | 0    | 0    | 0  | 0   | 0    | 0    | 0    | 0   | 0    | 0    | 0    | 0          | 0         | 0         | 0                      | 0   | 0              | 0               | 0    | G → T | Val288Leu | GBE05_01335 | Membrane protein                                                          | COG3949                                                      | S    | Function unknown                                                 |    |
| 329491-chr  | 0            | 0  | 0   | 0   | 0   | 0    | 0    | 0  | 0   | 0    | 0    | 0    | 0   | 0    | 0    | 0    | 0          | 0         | 0         | 0                      | 0   | 0              | 0               | 0    | G → A | Gly632Arg | lon         | Endopeptidase La Type I                                                   | COG1067                                                      | O    | Post-translational modification, protein turnover, and chaperone |    |
| 375390-chr  | 0            | 0  | 0   | 0   | 0   | 0    | 0    | 0  | 0   | 0    | 0    | 0    | 0   | 0    | 0    | 0    | 0          | 0         | 0         | 0                      | 0   | 0              | 0               | 0    | A → G | Glu462Gly | GBE05_01870 | VWA domain-containing protein                                             | COG2425                                                      | S    | Function unknown                                                 |    |
| 460318-chr  | 0            | 0  | 0   | 0   | 0   | 0    | 0    | 0  | 0   | 0    | 0    | 0    | 0   | 0    | 0    | 0    | 0          | 0         | 0         | 0                      | 0   | 0              | 0               | 0    | A → G | na        | -           | Intergenic region, upstream UTP-glucose-1-phosphate uridylyltransferase G | na                                                           | na   | na                                                               |    |
| 561576-chr  | 0            | 0  | 0   | 0   | 0   | 0    | 0    | 0  | 0   | 0    | 0    | 0    | 0   | 0    | 0    | 0    | 0          | 0         | 0         | 0                      | 0   | 0              | 0               | 0    | G → C | Val269Leu | GBE05_02745 | Cell adhesion protein                                                     | ENOG502ZDXD                                                  | S    | Function unknown                                                 |    |
| 678660-chr  | 0            | 0  | 0   | 0   | 0   | 0    | 0    | 0  | 0   | 0    | 0    | 0    | 0   | 0    | 0    | 0    | 0          | 0         | 0         | 0                      | 0   | 0              | 0               | 0    | G → A | Val565Ile | GBE05_03330 | AAA family ATPase                                                         | COG3973                                                      | L    | Replication, recombination and repair                            |    |
| 835081-chr  | 0            | 0  | 0   | 0   | 0   | 0    | 0    | 0  | 0   | 0    | 0    | 0    | 0   | 0    | 0    | 0    | 0          | 0         | 0         | 0                      | 0   | 0              | 0               | 0    | T → C | na        | -           | Intergenic region, upstream methyl-accepting chemotaxis protein           | na                                                           | na   | na                                                               |    |
| 900532-chr  | 0            | 0  | 0   | 0   | 0   | 0    | 0    | 0  | 0   | 0    | 0    | 0    | 0   | 0    | 0    | 0    | 0          | 0         | 0         | 0                      | 0   | 0              | 0               | 0    | insA  | Glu3fs    | GBE05_04245 | Flagellar biosynthesis protein FlgN                                       | COG3418                                                      | NOU  | Cell motility                                                    |    |
| 910750-chr  | 0            | 0  | 0   | 0   | 0   | 0    | 0    | 0  | 0   | 0    | 0    | 0    | 0   | 0    | 0    | 0    | 0          | 0         | 0         | 0                      | 0   | 0              | 0               | 0    | C → A | Gln255Lys | GBE05_04300 | Flagellin protein FlaA                                                    | COG1344                                                      | N    | Cell motility                                                    |    |
| 930531-chr  | 0            | 0  | 0   | 0   | 0   | 0    | 0    | 0  | 0   | 0    | 0    | 0    | 0   | 0    | 0    | 0    | 0          | 0         | 0         | 0                      | 0   | 0              | 0               | 0    | delA  | Ile811fs  | GBE05_04380 | DEAD/DEAH box helicase                                                    | COG0367                                                      | E    | Amino acid transport and metabolism                              |    |
| 993298-chr  | 0            | 0  | 0   | 0   | 0   | 0    | 0    | 0  | 0   | 0    | 0    | 0    | 0   | 0    | 0    | 0    | 0          | 0         | 0         | 0                      | 0   | 0              | 0               | 0    | C → T | Gln327*   | FlhA        | Flagellar biosynthesis protein FlhA                                       | COG1298                                                      | N    | Cell motility                                                    |    |
| 1035690-chr | 0            | 0  | 0   | 0   | 0   | 0    | 0    | 0  | 0   | 0    | 0    | 0    | 0   | 0    | 0    | 0    | 0          | 0         | 0         | 0                      | 0   | 0              | 0               | 0    | A → C | Lys70Leu  | GBE05_04900 | Aminopeptidase                                                            | COG1362                                                      | E    | Amino acid transport and metabolism                              |    |
| 1135705-chr | 0            | 0  | 0   | 0   | 0   | 0    | 0    | 0  | 0   | 0    | 0    | 0    | 0   | 0    | 0    | 0    | 0          | 0         | 0         | 0                      | 0   | 0              | 0               | 0    | C → A | na        | -           | Intergenic region, upstream asparaginase                                  | na                                                           | na   | na                                                               |    |
| 1232296-chr | 0            | 0  | 0   | 0   | 0   | 0    | 0    | 0  | 0   | 0    | 0    | 0    | 0   | 0    | 0    | 0    | 0          | 0         | 0         | 0                      | 0   | 0              | 0               | 0    | G → A | silent    | GBE05_05835 | PoIc-type DNA polymerase III                                              | COG2176                                                      | L    | Replication, recombination and repair                            |    |
| 1385000-chr | 0            | 0  | 0   | 0   | 0   | 0    | 0    | 0  | 0   | 0    | 0    | 0    | 0   | 0    | 0    | 0    | 0          | 0         | 0         | 0                      | 0   | 0              | 0               | 0    | delIT | Ile81fs   | GBE05_06775 | MarR family transcriptional regulator                                     | COG1378                                                      | K    | Transcription                                                    |    |
| 1509665-chr | 0            | 0  | 0   | 0   | 0   | 0    | 0    | 0  | 0   | 0    | 0    | 0    | 0   | 0    | 0    | 0    | 0          | 0         | 0         | 0                      | 0   | 0              | 0               | 0    | A → G | silent    | GBE05_07300 | ABC transporter permease                                                  | COG3127                                                      | Q    | Secondary metabolites biosynthesis, transport, and catabolism    |    |
| 1676949-chr | 0            | 0  | 0   | 0   | 0   | 0    | 0    | 0  | 0   | 0    | 0    | 0    | 0   | 0    | 0    | 0    | 0          | 0         | 0         | 0                      | 0   | 0              | 0               | 0    | T → C | Val82Ala  | GBE05_08080 | MurR/RpiR family transcriptional regulator                                | COG1737                                                      | K    | Transcription                                                    |    |
| 1684890-chr | 0            | 0  | 0   | 0   | 0   | 0    | 0    | 0  | 0   | 0    | 0    | 0    | 0   | 0    | 0    | 0    | 0          | 0         | 0         | 0                      | 0   | 0              | 0               | 0    | G → A | Pro270Leu | TreP        | PTS system trehalose-specific EIIBC component                             | COG1264                                                      | G    | Carbohydrate transport and metabolism                            |    |
| 1684891-chr | 0            | 0  | 0   | 0   | 0   | 0    | 0    | 0  | 0   | 0    | 0    | 0    | 0   | 0    | 0    | 0    | 0          | 0         | 0         | 0                      | 0   | 0              | 0               | 0    | G → T | Pro270Thr | TreP        | PTS system trehalose-specific EIIBC component                             | COG1264                                                      | G    | Carbohydrate transport and metabolism                            |    |
| 1687160-chr | 0            | 0  | 0   | 0   | 0   | 0    | 0    | 0  | 0   | 0    | 0    | 0    | 0   | 0    | 0    | 0    | 0          | 0         | 0         | 0                      | 0   | 0              | 0               | 0    | C → T | Ala195Thr | GBE05_08120 | DNA mismatch repair protein MutS                                          | COG0249                                                      | L    | Replication, recombination and repair                            |    |
| 1813463-chr | 0            | 0  | 0   | 0   | 0   | 0    | 0    | 0  | 0   | 0    | 0    | 0    | 0   | 0    | 0    | 0    | 0          | 0         | 0         | 0                      | 0   | 0              | 0               | 0    | G → A | na        | -           | Intergenic region upstream Spo0A                                          | na                                                           | na   | na                                                               |    |
| 1814301-chr | 0            | 0  | 0   | 0   | 0   | 0    | 0    | 0  | 0   | 0    | 0    | 0    | 0   | 0    | 0    | 0    | 0          | 0         | 0         | 0                      | 0   | 0              | 0               | 0    | G → C | Trp230Lys | Spo0A       | Spo0A master regulator                                                    | COG4753                                                      | T    | Signal transduction mechanisms                                   |    |
| 2128304-chr | 0            | 0  | 0   | 0   | 0   | 0    | 0    | 0  | 0   | 0    | 0    | 0    | 0   | 0    | 0    | 0    | 0          | 0         | 0         | 0                      | 0   | 0              | 0               | 0    | T → G | Lys31Gln  | GBE05_10110 | ABC transporter ATP-binding protein                                       | COG3842                                                      | P    | Inorganic ion transport and metabolism                           |    |
| 2380101-chr | 0            | 0  | 0   | 0   | 0   | 0    | 0    | 0  | 0   | 0    | 0    | 0    | 0   | 0    | 0    | 0    | 0          | 0         | 0         | 0                      | 0   | 0              | 0               | 0    | C → T | silent    | GBE05_11315 | Hypothetical protein                                                      | ENOG5030ZUJZ                                                 | S    | Function unknown                                                 |    |
| 2659033-chr | 0            | 0  | 0   | 0   | 0   | 0    | 0    | 0  | 0   | 0    | 0    | 0    | 0   | 0    | 0    | 0    | 0          | 0         | 0         | 0                      | 0   | 0              | 0               | 0    | G → C | Val235Leu | GBE05_12575 | Hypothetical protein                                                      | ENOG5030GWM                                                  | S    | Function unknown                                                 |    |
| 2751196-chr | 0            | 0  | 0   | 0   | 0   | 0    | 0    | 0  | 0   | 0    | 0    | 0    | 0   | 0    | 0    | 0    | 0          | 0         | 0         | 0                      | 0   | 0              | 0               | 0    | C → T | Gly124Arg | GBE05_12985 | Putative ABC transporter permease                                         | ENOG5033OYZ                                                  | S    | Function unknown                                                 |    |
| 2783238-chr | 0            | 0  | 0   | 0   | 0   | 0    | 0    | 0  | 0   | 0    | 0    | 0    | 0   | 0    | 0    | 0    | 0          | 0         | 0         | 0                      | 0   | 0              | 0               | 0    | A → C | na        | -           | Intergenic region, upstream cobyrinate a,c-diamide synthase               | na                                                           | na   | na                                                               |    |
| 2785098-chr | 0            | 0  | 0   | 0   | 0   | 0    | 0    | 0  | 0   | 0    | 0    | 0    | 0   | 0    | 0    | 0    | 0          | 0         | 0         | 0                      | 0   | 0              | 0               | 0    | C → T | na        | -           | Intergenic region upstream transcription initiation factor TFIIIB         | na                                                           | na   | na                                                               |    |
| 3312248-chr | 0            | 0  | 0   | 0   | 0   | 0    | 0    | 0  | 0   | 0    | 0    | 0    | 0   | 0    | 0    | 0    | 0          | 0         | 0         | 0                      | 0   | 0              | 0               | 0    | A → G | Val126Ala | ClpB        | ATP-dependent chaperone ClpB                                              | ENOG502NNKN                                                  | O    | Post-translational modification, protein turnover, and chaperone |    |
| 3316678-chr | 0            | 0  | 0   | 0   | 0   | 0    | 0    | 0  | 0   | 0    | 0    | 0    | 0   | 0    | 0    | 0    | 0          | 0         | 0         | 0                      | 0   | 0              | 0               | 0    | insT  | Asn81fs   | GBE05_15670 | Helix-turn-helix transcriptional regulator                                | COG3800                                                      | K    | Transcription                                                    |    |
| 3403617-chr | 0            | 0  | 0   | 0   | 0   | 0    | 0    | 0  | 0   | 0    | 0    | 0    | 0   | 0    | 0    | 0    | 0          | 0         | 0         | 0                      | 0   | 0              | 0               | 0    | C → A | Lys467Asn | GBE05_16005 | Histidine kinase                                                          | COG2202                                                      | T    | Signal transduction mechanisms                                   |    |
| 3403699-chr | 0            | 0  | 0   | 0   | 0   | 0    | 0    | 0  | 0   | 0    | 0    | 0    | 0   | 0    | 0    | 0    | 0          | 0         | 0         | 0                      | 0   | 0              | 0               | 0    | C → A | Gly440Val | GBE05_16005 | Histidine kinase                                                          | COG2202                                                      | T    | Signal transduction mechanisms                                   |    |
| 3403745-chr | 0            | 0  | 0   | 0   | 0   | 0    | 0    | 0  | 0   | 0    | 0    | 0    | 0   | 0    | 0    | 0    | 0          | 0         | 0         | 0                      | 0   | 0              | 0               | 0    | C → T | Gly425Arg | GBE05_16005 | Histidine kinase                                                          | COG2202                                                      | T    | Signal transduction mechanisms                                   |    |
| 3404298-chr | 0            | 0  | 0   | 0   | 0   | 0    | 0    | 0  | 0   | 0    | 0    | 0    | 0   | 0    | 0    | 0    | 0          | 0         | 0         | 0                      | 0   | 0              | 0               | 0    | A → C | Phe240Leu | GBE05_16005 | Histidine kinase                                                          | COG2202                                                      | T    | Signal transduction mechanisms                                   |    |
| 3404503-chr | 0            | 0  | 0   | 0   | 0   | 0    | 0    | 0  | 0   | 0    | 0    | 0    | 0   | 0    | 0    | 0    | 0          | 0         | 0         | 0                      | 0   | 0              | 0               | 0    | G → T | Ser727Tyr | GBE05_16005 | Histidine kinase                                                          | COG2202                                                      | T    | Signal transduction mechanisms                                   |    |
| 3405031-chr | 0            | 0  | 0   | 0   | 0   | 0    | 0    | 0  | 0   | 0    | 0    | 0    | 0   | 0    | 0    | 0    | 0          | 0         | 0         | 0                      | 0   | 0              | 0               | 0    | C → T | na        | -           | Intergenic region within agr region II                                    | na                                                           | na   | na                                                               |    |
| 3406020-chr | 0            | 0  | 0   | 0   | 0   | 0    | 0    | 0  | 0   | 0    | 0    | 0    | 0   | 0    | 0    | 0    | 0          | 0         | 0         | 0                      | 0   | 0              | 0               | 0    | G → T | Ser125Arg | GBE05_16020 | Histidine kinase                                                          | ENOG5033NXY                                                  | S    | Function unknown                                                 |    |
| 3406111-chr | 0            | 0  | 0   | 0   | 0   | 0    | 0    | 0  | 0   | 0    | 0    | 0    | 0   | 0    | 0    | 0    | 0          | 0         | 0         | 0                      | 0   | 0              | 0               | 0    | delA  | Leu95fs   | GBE05_16020 | Histidine kinase                                                          | ENOG5033NXY                                                  | S    | Function unknown                                                 |    |
| 3406139-chr | 0            | 0  | 0   | 0   | 0   | 0    | 0    | 0  | 0   | 0    | 0    | 0    | 0   | 0    | 0    | 0    | 0          | 0         | 0         | 0                      | 0   | 0              | 0               | 0    | A → G | Ser86Pro  | GBE05_16020 | Histidine kinase                                                          | ENOG5033NXY                                                  | S    | Function unknown                                                 |    |
| 3406863-chr | 0            | 0  | 0   | 0   | 0   | 0    | 0    | 0  | 0   | 0    | 0    | 0    | 0   | 0    | 0    | 0    | 0          | 0         | 0         | 0                      | 0   | 0              | 0               | 0    | insA  | Gln537fs  | GBE05_16025 | Sensory transduction histidine kinase                                     | COG2202                                                      | T    | Signal transduction mechanisms                                   |    |
| 3407428-chr | 0            | 0  | 0   | 0   | 0   | 0    | 0    | 0  | 0   | 0    | 0    | 0    | 0   | 0    | 0    | 0    | 0          | 0         | 0         | 0                      | 0   | 0              | 0               | 0    | delIT | Asn348fs  | GBE05_16025 | Sensory transduction histidine kinase                                     | COG2202                                                      | T    | Signal transduction mechanisms                                   |    |
| 3407745-chr | 0            | 0  | 0   | 0   | 0   | 0    | 0    | 0  | 0   | 0    | 0    | 0    | 0   | 0    | 0    | 0    | 0          | 0         | 0         | 0                      | 0   | 0              | 0               | 0    | A → C | Tyr242*   | GBE05_16025 | Sensory transduction histidine kinase                                     | COG2202                                                      | T    | Signal transduction mechanisms                                   |    |
| 3407852-chr | 0            | 0  | 0   | 0   | 0   | 0    | 0    | 0  | 0   | 0    | 0    | 0    | 0   | 0    | 0    | 0    | 0          | 0         | 0         | 0                      | 0   | 0              | 0               | 0    | G → A | Gln207*   | GBE05_16025 | Sensory transduction histidine kinase                                     | COG2202                                                      | T    | Signal transduction mechanisms                                   |    |
| 3407927-chr | 0            | 0  | 0   | 0   | 0   | 0    | 0    | 0  | 0   | 0    | 0    | 0    | 0   | 0    | 0    | 0    | 0          | 0         | 0         | 0                      | 0   | 0              | 0               | 0    | A → C | Tyr182Asp | GBE05_16025 | Sensory transduction histidine kinase                                     | COG2202                                                      | T    | Signal transduction mechanisms                                   |    |
| 3540160-chr | 0            | 0  | 0   | 0   | 0   | 0    | 0    | 0  | 0   | 0    | 0    | 0    | 0   | 0    | 0    | 0    | 0          | 0         | 0         | 0                      | 0   | 0              | 0               | 0    | C → T | Met1Ile   | GBE05_16640 | DegV family protein (start codon loss)                                    | COG1307                                                      | S    | Function unknown                                                 |    |
| 3797980-chr | 0            | 0  | 0   | 0   | 0   | 0    | 0    | 0  | 0   | 0    | 0    | 0    | 0   | 0    | 0    | 0    | 0          | 0         | 0         | 0                      | 0   | 0              | 0               | 0    | C → A | Asn448Lys | MmmE        | tRNA uridine-5-carboxymethylaminomethyl(34) synthesis GTPase MmmE         | COG0486                                                      | S    | Function unknown                                                 |    |
| 3833093-chr | 0            | 0  | 0   |     |     |      |      |    |     |      |      |      |     |      |      |      |            |           |           |                        |     |                |                 |      |       |           |             |                                                                           |                                                              |      |                                                                  |    |

## Part D. Detailed re-sequencing results

The lists of variants of each isolate are detailed below. The lists combined the results from the basic variant detection tool and the InDel and structural variant tool.

Isolate ST7B (used as the reference strain in this study)

- *List of variants, insertions and deletions*

| Mapping    | Reference Position | Type      | Reference | Allele | Count | Coverage | Frequency | Forward/reverse balance | Average quality† | Annotations       | Coding region change | AA change | Remarks                   |
|------------|--------------------|-----------|-----------|--------|-------|----------|-----------|-------------------------|------------------|-------------------|----------------------|-----------|---------------------------|
| plasmid    | 1287 (#)           | Insertion | -         | CTAG   | 1995  | 2295.00  | 86.93     | 0.28                    | 36.30            |                   |                      |           | FP; Sequencing errors     |
| chromosome | 2144663 (#)        | Deletion  | T         | -      | 219   | 229.00   | 95.63     | 0.46                    | 34.83            |                   |                      |           | FP; Sequencing errors     |
| chromosome | 2144724 (#)        | Deletion  | T         | -      | 175   | 204.00   | 85.78     | 0.35                    | 35.05            |                   |                      |           | FP; Sequencing errors     |
| chromosome | 3248010 (#)        | Deletion  | T         | -      | 316   | 335.00   | 94.33     | 0.31                    | 33.78            | G8E05_15385       | c.28delA             | p.Ile10fs | FP; Sequencing errors     |
| chromosome | 3248172 (#)        | Deletion  | T         | -      | 257   | 270.00   | 95.19     | 0.38                    | 35.19            |                   |                      |           | FP; Sequencing errors     |
| chromosome | 3368968 (#)        | Deletion  | GTG       | -      | 295   | 330.00   | 89.39     | 0.30                    | 34.62            |                   |                      |           | FP; Sequencing errors     |
| chromosome | 3735024 (#)        | Deletion  | C         | -      | 48    | 48.00    | 100.00    | 0.00                    | 33.73            | rRNA: G8E05_17585 |                      |           | Non-specific read matches |

Note: FP, false positive; (#), verified by Sanger sequencing, † Phred score

- *Ambiguous variants*

| Mapping    | Reference Position | Reference | Allele | CLC Genomic Workbench                   | Remarks                         |
|------------|--------------------|-----------|--------|-----------------------------------------|---------------------------------|
| chromosome | 3735024            | C         | -      | Non-specific and ambiguous read matches | Ambiguous variant, filtered out |

- *Variants verified by Sanger sequencing*

| Mapping | Reference Position | Reference | Allele | PCR primers                                                        | Sanger sequencing results                                                             |
|---------|--------------------|-----------|--------|--------------------------------------------------------------------|---------------------------------------------------------------------------------------|
| plasmid | 1287               | -         | CTAG   | for, TGG CTG GGG TGA AAA GTA TC<br>rev, TGG GGA TTA GTT GGA CTT GC |  |

|            |         |     |   |                                                                             |  |
|------------|---------|-----|---|-----------------------------------------------------------------------------|--|
| chromosome | 2144663 | T   | - | for, CCA AGA GCT TCT CCC ATA CC<br>rev, GGA AGG AAC AAT GGC GAA T           |  |
| chromosome | 2144724 | T   | - | for, ATA TAC CGC AGC CGT TTC CT<br>rev, TTT ACG CCA CAT ATC CCT ATT T       |  |
| chromosome | 3248010 | T   | - | for, CCT GTG CCA TAG CTC CAG AT<br>rev, TTG TTC CCT AAG AGT GCT AAT GC      |  |
| chromosome | 3248172 | T   | - | for, CCT GTG CCA TAG CTC CAG AT<br>rev, AGA GGA AAT GGC GCT AGC TT          |  |
| chromosome | 3368968 | GTG | - | for, TTG TTG AAT GCT TTT ATT ACG TAC TTT<br>rev, TTC CTG TGG AAC ACG AGA CA |  |

All variants reported in ST7B read mapping results are false positive (FP) and/or ambiguous variants (AV). They were either located in a region with non-specific read matches (1 occurrence) or were genome sequencing/assembly errors, as verified by Sanger sequencing above. In ST7B and other isolates, false-positive variants reported at positions 1287, 2144663, 2144724, 3248010, 3248172, 3368968 and 3735024 were therefore filtered out from the subsequent lists of variants and the downstream SNP analysis. Same applied to variants located in regions with non-specific read matches.

## Isolate H4

- *List of variants*

| Mapping    | Reference Position | Type | Reference | Allele | Count | Coverage | Frequency | Forward/reverse read balance | Average quality† | Annotations       | Coding region change | AA change   |
|------------|--------------------|------|-----------|--------|-------|----------|-----------|------------------------------|------------------|-------------------|----------------------|-------------|
| chromosome | 460318             | SNV  | A         | G      | 135   | 135      | 100.00    | 0.24                         | 36.82            |                   |                      |             |
| chromosome | 2659033            | SNV  | C         | G      | 248   | 248      | 100.00    | 0.41                         | 36.37            | Gene: G8E05_12575 | c.703C>G             | p.Leu235Val |
| chromosome | 2785098            | SNV  | C         | T      | 171   | 171      | 100.00    | 0.40                         | 35.81            |                   |                      |             |
| chromosome | 3403699            | SNV  | C         | A      | 224   | 224      | 100.00    | 0.30                         | 36.20            | G8E05_16005       | c.1319G>T            | p.Gly440Val |
| chromosome | 3833247            | SNV  | A         | G      | 293   | 293      | 100.00    | 0.14                         | 36.34            | G8E05_18150       | c.198A>G             |             |

† Phred score



## Isolate H18

- *List of variants*

| Mapping    | Reference Position | Type | Reference | Allele | Count | Coverage | Frequency | Forward/reverse read balance | Average quality† | Annotations | Coding region change | AA change   |
|------------|--------------------|------|-----------|--------|-------|----------|-----------|------------------------------|------------------|-------------|----------------------|-------------|
| chromosome | 460318             | SNV  | A         | G      | 119   | 119.00   | 100.00    | 0.17                         | 36.60            |             |                      |             |
| chromosome | 2659033            | SNV  | C         | G      | 217   | 217.00   | 100.00    | 0.47                         | 36.12            | G8E05_12575 | c.703C>G             | p.Leu235Val |
| chromosome | 2785098            | SNV  | C         | T      | 1750  | 175.00   | 100.00    | 0.44                         | 36.31            |             |                      |             |
| chromosome | 3403699            | SNV  | C         | A      | 209   | 209.00   | 100.00    | 0.26                         | 36.66            | G8E05_16005 | c.1319G>T            | p.Gly440Val |
| chromosome | 3833247            | SNV  | A         | G      | 253   | 253.00   | 100.00    | 0.16                         | 36.10            | G8E05_18150 | c.198A>G             |             |

† Phred score

## Isolate V41

- List of variants

| Mapping    | Reference Position | Type | Reference | Allele | Count | Coverage | Frequency | Forward/reverse read balance | Average quality† | Annotations | Coding region change | AA change   |
|------------|--------------------|------|-----------|--------|-------|----------|-----------|------------------------------|------------------|-------------|----------------------|-------------|
| chromosome | 460318             | SNV  | A         | G      | 150   | 150      | 100.00    | 0.21                         | 36.60            |             |                      |             |
| chromosome | 2659033            | SNV  | C         | G      | 299   | 299      | 100.00    | 0.41                         | 36.24            | G8E05_12575 | c.703C>G             | p.Leu235Val |
| chromosome | 2785098            | SNV  | C         | T      | 201   | 201      | 100.00    | 0.41                         | 36.10            |             |                      |             |
| chromosome | 3403699            | SNV  | C         | A      | 251   | 251      | 100.00    | 0.27                         | 36.33            | G8E05_16005 | c.1319G>T            | p.Gly440Val |
| chromosome | 3403745            | SNV  | C         | T      | 293   | 347      | 84.44     | 0.44                         | 36.18            | G8E05_16005 | c.1273G>A            | p.Gly425Arg |
| chromosome | 3407927            | SNV  | A         | C      | 81    | 95       | 85.26     | 0.38                         | 36.70            | G8E05_16025 | c.544T>G             | p.Tyr182Asp |
| chromosome | 3833247            | SNV  | A         | G      | 308   | 308      | 100.00    | 0.10                         | 36.38            | G8E05_18150 | c.198A>G             |             |

† Phred score

## Isolate V62

- *List of variants*

| Mapping    | Reference Position | Type | Reference | Allele | Count | Coverage | Frequency | Forward/reverse read balance | Average quality† | Annotations | Coding region change | AA change   |
|------------|--------------------|------|-----------|--------|-------|----------|-----------|------------------------------|------------------|-------------|----------------------|-------------|
| chromosome | 460318             | SNV  | A         | G      | 145   | 145      | 100.00    | 0.32                         | 36.42            |             |                      |             |
| chromosome | 2659033            | SNV  | C         | G      | 155   | 155      | 100.00    | 0.34                         | 36.30            | G8E05_12575 | c.703C>G             | p.Leu235Val |
| chromosome | 2785098            | SNV  | C         | T      | 148   | 148      | 100.00    | 0.42                         | 35.54            |             |                      |             |
| chromosome | 3403699            | SNV  | C         | A      | 132   | 132      | 100.00    | 0.31                         | 35.55            | G8E05_16005 | c.1319G>T            | p.Gly440Val |
| chromosome | 3404298            | SNV  | A         | C      | 108   | 108      | 100.00    | 0.44                         | 36.00            | G8E05_16005 | c.720T>G             | p.Phe240Leu |
| chromosome | 3833247            | SNV  | A         | G      | 329   | 329      | 100.00    | 0.21                         | 36.31            | G8E05_18150 | c.198A>G             |             |

† Phred score

## Isolate V134

- *List of variants*

| Mapping    | Reference Position | Type | Reference | Allele | Count | Coverage | Frequency | Forward/reverse read balance | Average quality† | Annotations | Coding region change | AA change   |
|------------|--------------------|------|-----------|--------|-------|----------|-----------|------------------------------|------------------|-------------|----------------------|-------------|
| chromosome | 460318             | SNV  | A         | G      | 119   | 119      | 100.00    | 0.25                         | 36.39            |             |                      |             |
| chromosome | 2659033            | SNV  | C         | G      | 278   | 278      | 100.00    | 0.43                         | 36.18            | G8E05_12575 | c.703C>G             | p.Leu235Val |
| chromosome | 2785098            | SNV  | C         | T      | 186   | 186      | 100.00    | 0.44                         | 35.06            |             |                      |             |
| chromosome | 3403699            | SNV  | C         | A      | 191   | 191      | 100.00    | 0.36                         | 36.37            | G8E05_16005 | c.1319G>T            | p.Gly440Val |
| chromosome | 3833247            | SNV  | A         | G      | 249   | 249      | 100.00    | 0.14                         | 36.52            | G8E05_18150 | c.198A>G             |             |

† Phred score

## Isolate V173

- *List of variants*

Basic variant detection yielded to 91 272 variants (data not shown), indicating that both isolates (V173 and ST7B) are not closely phylogenetically related.

Subsequent *de novo* genome assembly confirmed that V173 is a distinct strain from all other isolates analysed in this work, as further elaborated in the main text of our article, which makes the listing of all variants found in V173 irrelevant. V173 was therefore not included in the SNP analysis of other isolates.

## Isolate V206

- *List of variants*

| Mapping    | Reference Position | Type | Reference | Allele | Count | Coverage | Frequency | Forward/reverse read balance | Average quality† | Annotations | Coding region change | AA change   |
|------------|--------------------|------|-----------|--------|-------|----------|-----------|------------------------------|------------------|-------------|----------------------|-------------|
| chromosome | 460318             | SNV  | A         | G      | 179   | 179      | 100.00    | 0.28                         | 36.46            |             |                      |             |
| chromosome | 2659033            | SNV  | C         | G      | 288   | 288      | 100.00    | 0.40                         | 36.50            | G8E05_12575 | c.703C>G             | p.Leu235Val |
| chromosome | 2785098            | SNV  | C         | T      | 208   | 208      | 100.00    | 0.41                         | 35.79            |             |                      |             |
| chromosome | 3403699            | SNV  | C         | A      | 246   | 246      | 100.00    | 0.24                         | 36.32            | G8E05_16005 | :c.1319G>T           | p.Gly440Val |
| chromosome | 3833247            | SNV  | A         | G      | 286   | 286      | 100.00    | 0.17                         | 36.37            | G8E05_18150 | c.198A>G             |             |

(#) confirmed by Sanger sequencing, † Phred score

## Isolate V1

- List of variants

| Mapping | Reference Position | Type | Reference | Allele | Count | Coverage | Frequency | Forward/reverse read balance | Average quality† | Annotations | Coding region change | AA change   |
|---------|--------------------|------|-----------|--------|-------|----------|-----------|------------------------------|------------------|-------------|----------------------|-------------|
| chr     | 460318             | SNV  | A         | G      | 169   | 169      | 100.00    | 0.26                         | 36.43            |             |                      |             |
| chr     | 1813463 (#)        | SNV  | G         | A      | 107   | 113      | 94.69     | 0.35                         | 36.44            |             |                      |             |
| chr     | 2659033            | SNV  | C         | G      | 212   | 212      | 100.00    | 0.46                         | 36.15            | G8E05_12575 | c.703C>G             | p.Leu235Val |
| chr     | 2785098            | SNV  | C         | T      | 207   | 207      | 100.00    | 0.42                         | 35.72            |             |                      |             |
| chr     | 3403699            | SNV  | C         | A      | 270   | 270      | 100.00    | 0.29                         | 36.24            | G8E05_16005 | c.1319G>T            | p.Gly440Val |
| chr     | 3833247            | SNV  | A         | G      | 313   | 313      | 100.00    | 0.18                         | 36.16            | G8E05_18150 | c.198A>G             |             |

(#) verified by Sanger sequencing, † Phred score

- Variants of verified by Sanger sequencing

| Mapping    | Reference Position | Reference | Allele | PCR primers                                                           | Sanger sequencing results                       |
|------------|--------------------|-----------|--------|-----------------------------------------------------------------------|-------------------------------------------------|
| chromosome | 1813463            | G         | A      | for, GCA TGA GCG GGA GTC CTA T<br>rev, TCA TCT GCG ATG ATA ACA TTG AT | <p>ATGACAAAATAAAATATATGTAATTACCATATAAAGTGTA</p> |

## Isolate V4

- List of variants

| Mapping    | Reference Position | Type | Reference | Allele | Count | Coverage | Frequency | Forward/reverse read balance | Average quality† | Annotations | Coding region change | AA change   |
|------------|--------------------|------|-----------|--------|-------|----------|-----------|------------------------------|------------------|-------------|----------------------|-------------|
| chromosome | 460318             | SNV  | A         | G      | 107   | 108      | 99.07     | 0.23                         | 36.78            |             |                      |             |
| chromosome | 2659033            | SNV  | C         | G      | 321   | 321      | 100.00    | 0.43                         | 36.44            | G8E05_12575 | c.703C>G             | p.Leu235Val |
| chromosome | 2785098            | SNV  | C         | T      | 199   | 199      | 100.00    | 0.41                         | 36.16            |             |                      |             |
| chromosome | 3403699            | SNV  | C         | A      | 175   | 175      | 100.00    | 0.25                         | 36.45            | G8E05_16005 | c.1319G>T            | p.Gly440Val |
| chromosome | 3833247            | SNV  | A         | G      | 300   | 300      | 100.00    | 0.15                         | 36.52            | G8E05_18150 | c.198A>G             |             |

† Phred score

- List of Insertions, deletions and structural variants

| Mapping | Region         | Type                    | NGS evidence                                 | PCR Evidence                                                                                                                                                                                     |
|---------|----------------|-------------------------|----------------------------------------------|--------------------------------------------------------------------------------------------------------------------------------------------------------------------------------------------------|
| plasmid | Entire plasmid | Deletion (plasmid loss) | Coverage information<br>Read mapping results | <p>plasmid-specific primer pairs<br/>for, TGG CTG GGG TGA AAA GTA TC<br/>rev, TGG GGA TTA GTT GGA CTT GC</p> 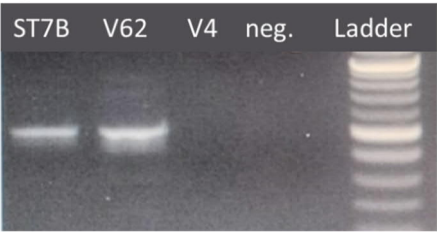 |



## Isolate V73

- List of variants, insertions and deletions

| Mapping    | Reference Position | Type | Reference | Allele | Count | Coverage | Frequency | Forward/reverse read balance | Average quality† | Annotations | Coding region change | AA change   |
|------------|--------------------|------|-----------|--------|-------|----------|-----------|------------------------------|------------------|-------------|----------------------|-------------|
| chromosome | 460318             | SNV  | A         | G      | 191   | 191      | 100.00    | 0.27                         | 36.07            |             |                      |             |
| chromosome | 2659033            | SNV  | C         | G      | 192   | 193      | 99.48     | 0.48                         | 36.25            | G8E05_12575 | c.703C>G             | p.Leu235Val |
| chromosome | 2785098            | SNV  | C         | T      | 190   | 190      | 100.00    | 0.42                         | 35.80            |             |                      |             |
| chromosome | 3403699            | SNV  | C         | A      | 117   | 117      | 100.00    | 0.48                         | 36.15            | G8E05_16005 | c.1319G>T            | p.Gly440Val |
| chromosome | 3406020            | SNV  | G         | T      | 71    | 94       | 75.53     | 0.40                         | 36.18            | G8E05_16020 | c.375C>A             | p.Ser125Arg |
| chromosome | 3833247            | SNV  | A         | G      | 218   | 218      | 100.00    | 0.19                         | 35.83            | G8E05_18150 | c.198A>G             |             |

† Phred score

| Mapping    | Region    | Name      | Evidence          | Variant ratio | Sequence complexity | Remarks                                                      |
|------------|-----------|-----------|-------------------|---------------|---------------------|--------------------------------------------------------------|
| chromosome | 3646760-7 | Insertion | Close breakpoints | 0.92          | 0.252281            | Presence of a large DNA element inserted into the chromosome |

Note: Unmapped reads were *de novo* assembled and yielded to contigs with an estimated size of 50 kb with boundaries overlapping with the insertion region indicated above. Phaster analysis showed the presence of phage elements within the assembled fragment, suggesting that a prophage was inserted into that specific chromosomal location.

## Isolate ST25

- List of variants

| Mapping    | Reference Position | Type | Reference | Allele | Count | Coverage | Frequency | Forward/reverse read balance | Average quality† | Annotations | Coding region change | AA change   |
|------------|--------------------|------|-----------|--------|-------|----------|-----------|------------------------------|------------------|-------------|----------------------|-------------|
| chromosome | 460318             | SNV  | A         | G      | 42    | 42       | 100.00    | 0.29                         | 36.67            |             |                      |             |
| chromosome | 678660             | SNV  | G         | A      | 133   | 133      | 100.00    | 0.40                         | 36.08            | G8E05_03330 | c.1693G>A            | p.Val565Ile |
| chromosome | 1684891 (#)        | SNV  | G         | T      | 108   | 141      | 76.60     | 0.43                         | 35.31            | treP        | c.808C>A             | p.Pro270Thr |
| chromosome | 2659033            | SNV  | C         | G      | 143   | 143      | 100.00    | 0.43                         | 36.20            | G8E05_12575 | c.703C>G             | p.Leu235Val |
| chromosome | 2785098            | SNV  | C         | T      | 228   | 228      | 100.00    | 0.47                         | 36.20            |             |                      |             |
| chromosome | 3403617            | SNV  | C         | A      | 66    | 83       | 79.52     | 0.43                         | 35.88            | G8E05_16005 | c.1401G>T            | p.Lys467Asn |
| chromosome | 3403699            | SNV  | C         | A      | 71    | 71       | 100.00    | 0.49                         | 36.01            | G8E05_16005 | c.1319G>T            | p.Gly440Val |
| chromosome | 3407852 (#)        | SNV  | G         | A      | 40    | 40       | 100.00    | 0.44                         | 34.65            | G8E05_16025 | c.619C>T             | p.Gln207*   |
| chromosome | 3833247            | SNV  | A         | G      | 99    | 99       | 100.00    | 0.17                         | 36.10            | G8E05_18150 | c.198A>G             |             |

† Phred score

- Variants verified by Sanger sequencing

| Mapping    | Reference Position | Reference | Allele | PCR primers                                                                 | Sanger sequencing results                    |
|------------|--------------------|-----------|--------|-----------------------------------------------------------------------------|----------------------------------------------|
| chromosome | 1684891            | G         | T      | for, TTC CAC CAA GTT CAG CCA TT<br>rev, AAG ATG GGC ACC ACA CAA AT          | <p>TATCAATACAGTAGGTACTGTAGAAAGAAAAGGCAC</p>  |
| chromosome | 3407852            | G         | A      | for, CCC ATC ATA TAT AAC ATA GGT GGA TGT<br>rev, ATT GGG AAT GGA ACA TGG AA | <p>TCTTTTTTGTATTTCTTTCTAGTCTAATTTATTAGCT</p> |

- *Stability of SNP at position 1684891 (TreP, PTS system trehalose-specific component) after 10 consecutive subculturings in TPGY (rich medium) in laboratory conditions*

ST25 was consecutively sub-cultured 10 times in TPGY broth in laboratory conditions. Using the same primer pair as indicated above, we amplified the region encompassing the TreP SNP and sent it for Sanger sequencing. We observed that the population carrying G at position 1684891 become dominant, as opposed to what we observed in the original Sanger sequencing (see above), where most of the population harboured T.

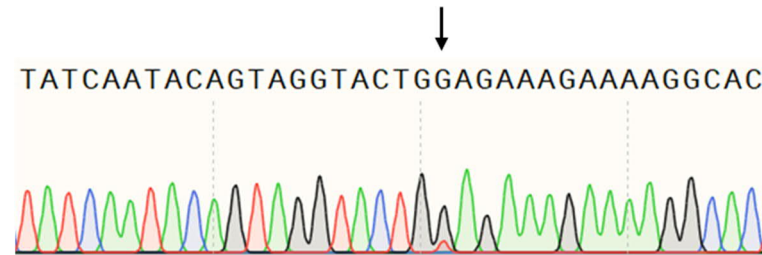

## Isolate ST19

- List of variants

| Mapping    | Reference Position | Type | Reference | Allele | Count | Coverage | Frequency | Forward/reverse read balance | Average quality† | Annotations | Coding region change | AA change   |
|------------|--------------------|------|-----------|--------|-------|----------|-----------|------------------------------|------------------|-------------|----------------------|-------------|
| chromosome | 460318             | SNV  | A         | G      | 143   | 143      | 100.00    | 0.36                         | 36.45            |             |                      |             |
| chromosome | 910750 (#)         | SNV  | C         | A      | 125   | 177      | 70.62     | 0.43                         | 36.50            | G8E05_04300 | c.763C>A             | p.Gln255Lys |
| chromosome | 1135705            | SNV  | C         | A      | 116   | 116      | 100.00    | 0.29                         | 36.16            |             |                      |             |
| chromosome | 2659033            | SNV  | C         | G      | 340   | 340      | 100.00    | 0.44                         | 36.46            | G8E05_12575 | c.703C>G             | p.Leu235Val |
| chromosome | 2785098            | SNV  | C         | T      | 242   | 242      | 100.00    | 0.46                         | 36.30            |             |                      |             |
| chromosome | 3403699            | SNV  | C         | A      | 235   | 235      | 100.00    | 0.37                         | 36.10            | G8E05_16005 | c.1319G>T            | p.Gly440Val |
| chromosome | 3404503            | SNV  | G         | T      | 195   | 205      | 95.12     | 0.28                         | 36.41            | G8E05_16005 | c.515C>A             | p.Ser172Tyr |
| chromosome | 3833247            | SNV  | A         | G      | 356   | 356      | 100.00    | 0.21                         | 36.07            | G8E05_18150 | c.198A>G             |             |

(#) verified by Sanger sequencing, † Phred score

- Variants verified by Sanger sequencing

| Mapping    | Reference Position | Reference | Allele | PCR primers                                                            | Sanger sequencing results |
|------------|--------------------|-----------|--------|------------------------------------------------------------------------|---------------------------|
| chromosome | 910750             | C         | A      | for, TGG AGC TGC TAG TAT TAC AGG AA<br>rev, AGA AAC TCC GCC TCC TTA CG |                           |

## Isolate ST4

- *List of variants*

| Mapping    | Reference Position | Type | Reference | Allele | Count | Coverage | Frequency | Forward/reverse read balance | Average quality† | Annotations | Coding region change | Amino acid change |
|------------|--------------------|------|-----------|--------|-------|----------|-----------|------------------------------|------------------|-------------|----------------------|-------------------|
| chromosome | 460318             | SNV  | A         | G      | 125   | 125      | 100       | 0.32                         | 36.232           |             |                      |                   |
| chromosome | 2659033            | SNV  | C         | G      | 285   | 285      | 100       | 0.465035                     | 36.46667         | G8E05_12575 | c.703C>G             | p.Leu235Val       |
| chromosome | 2785098            | SNV  | C         | T      | 302   | 302      | 100       | 0.44702                      | 36.1457          |             |                      |                   |
| chromosome | 3403699            | SNV  | C         | A      | 117   | 117      | 100       | 0.367521                     | 36.1453          | G8E05_16005 | c.1319G>T            | p.Gly440Val       |
| chromosome | 3833247            | SNV  | A         | G      | 288   | 288      | 100       | 0.138889                     | 36.08681         | G8E05_18150 | c.198A>G             |                   |

† Phred score

## Isolate ST7

- *List of variants*

| Mapping    | Reference Position | Type | Reference | Allele | Count | Coverage | Frequency | Forward/reverse read balance | Average quality† | Annotations       | Coding region change | AA change   |
|------------|--------------------|------|-----------|--------|-------|----------|-----------|------------------------------|------------------|-------------------|----------------------|-------------|
| chromosome | 1981               | SNV  | C         | T      | 74    | 74       | 100.00    | 0.26                         | 36.14            | rRNA: G8E05_00010 |                      |             |
| chromosome | 375390             | SNV  | A         | G      | 162   | 162      | 100.00    | 0.47                         | 35.84            | G8E05_01870       | c.1385A>G            | p.Glu462Gly |
| chromosome | 460318             | SNV  | A         | G      | 162   | 162      | 100.00    | 0.36                         | 36.41            |                   |                      |             |
| chromosome | 2659033            | SNV  | C         | G      | 210   | 210      | 100.00    | 0.42                         | 36.25            | G8E05_12575       | c.703C>G             | p.Leu235Val |
| chromosome | 2751196            | SNV  | C         | T      | 209   | 209      | 100.00    | 0.47                         | 36.43            | G8E05_12985       | c.370G>A             | p.Gly124Arg |
| chromosome | 2785098            | SNV  | C         | T      | 257   | 257      | 100.00    | 0.43                         | 35.98            |                   |                      |             |
| chromosome | 3403699            | SNV  | C         | A      | 166   | 166      | 100.00    | 0.36                         | 36.24            | G8E05_16005       | c.1319G>T            | p.Gly440Val |
| chromosome | 3406020            | SNV  | G         | T      | 106   | 145      | 73.10     | 0.48                         | 36.83            | G8E05_16020       | c.375C>A             | p.Ser125Arg |
| chromosome | 3833247            | SNV  | A         | G      | 303   | 303      | 100.00    | 0.15                         | 36.13            | G8E05_18150       | c.198A>G             |             |

† Phred score

- *Ambiguous variant – located in a region with non-specific read matches*

| Mapping    | Reference Position | Type | Reference | Allele | Count | Coverage | Frequency | Forward/reverse read balance | Average quality† | Annotations       | Coding region change | AA change |
|------------|--------------------|------|-----------|--------|-------|----------|-----------|------------------------------|------------------|-------------------|----------------------|-----------|
| chromosome | 1981               | SNV  | C         | T      | 74    | 74       | 100.00    | 0.26                         | 36.14            | rRNA: G8E05_00010 |                      |           |

## Isolate ST21

- List of variants

| Mapping    | Reference Position | Type | Reference | Allele | Count | Coverage | Frequency | Forward/reverse read balance | Average quality | Annotations | Coding region change | AA change   |
|------------|--------------------|------|-----------|--------|-------|----------|-----------|------------------------------|-----------------|-------------|----------------------|-------------|
| chromosome | 332941             | SNV  | G         | A      | 268   | 268      | 100.00    | 0.38                         | 36.62           | lon         | c.1894G>A            | p.Gly632Arg |
| chromosome | 460318             | SNV  | A         | G      | 92    | 92       | 100.00    | 0.34                         | 36.43           |             |                      |             |
| chromosome | 2659033            | SNV  | C         | G      | 349   | 349      | 100.00    | 0.49                         | 36.48           | G8E05_12575 | c.703C>G             | p.Leu235Val |
| chromosome | 2785098            | SNV  | C         | T      | 259   | 259      | 100.00    | 0.40                         | 36.40           |             |                      |             |
| chromosome | 3403699            | SNV  | C         | A      | 169   | 169      | 100.00    | 0.31                         | 35.95           | G8E05_16005 | c.1319G>T            | p.Gly440Val |
| chromosome | 3406139            | SNV  | A         | G      | 133   | 133      | 100.00    | 0.25                         | 36.43           | G8E05_16020 | c.256T>C             | p.Ser86Pro  |
| chromosome | 3833247            | SNV  | A         | G      | 210   | 210      | 100.00    | 0.17                         | 36.05           | G8E05_18150 | c.198A>G             |             |

† Phred score

## Isolate ST29

- List of variants

| Mapping    | Reference Position | Type | Reference | Allele | Count | Coverage | Frequency | Forward/reverse read balance | Average quality† | Annotations | Coding region change | AA change   |
|------------|--------------------|------|-----------|--------|-------|----------|-----------|------------------------------|------------------|-------------|----------------------|-------------|
| chromosome | 460318             | SNV  | A         | G      | 204   | 204      | 100.00    | 0.30                         | 36.23            |             |                      |             |
| chromosome | 2659033            | SNV  | C         | G      | 261   | 261      | 100.00    | 0.49                         | 36.49            | G8E05_12575 | c.703C>G             | p.Leu235Val |
| chromosome | 2785098            | SNV  | C         | T      | 256   | 257      | 99.61     | 0.47                         | 36.18            |             |                      |             |
| chromosome | 3403699            | SNV  | C         | A      | 263   | 263      | 100.00    | 0.41                         | 36.29            | G8E05_16005 | c.1319G>T            | p.Gly440Val |
| chromosome | 3407745 (#)        | SNV  | A         | C      | 133   | 139      | 95.68     | 0.48                         | 36.61            | G8E05_16025 | c.726T>G             | p.Tyr242*   |
| chromosome | 3833247            | SNV  | A         | G      | 384   | 384      | 100.00    | 0.17                         | 36.35            | G8E05_18150 | c.198A>G             |             |

(#) verified by Sanger sequencing, † Phred score

- Variants verified by Sanger sequencing

| Mapping    | Reference Position | Reference | Allele | PCR primers                                                                 | Sanger sequencing results                                                                                                     |
|------------|--------------------|-----------|--------|-----------------------------------------------------------------------------|-------------------------------------------------------------------------------------------------------------------------------|
| chromosome | 3407745            | A         | C      | for, CCC ATC ATA TAT AAC ATA GGT GGA TGT<br>rev, ATT GGG AAT GGA ACA TGG AA | 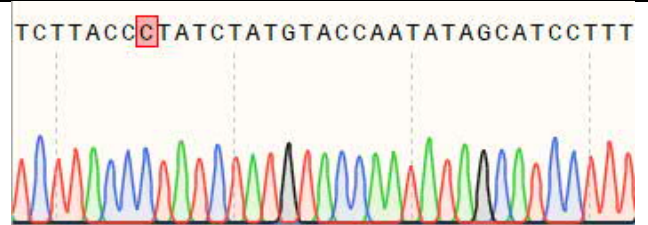 <p>TCTTACCCATCTATGTACCAATATAGCATCCTTT</p> |



## Isolate ST31

- *List of variants*

| Mapping    | Reference Position | Type | Reference | Allele | Count | Coverage | Frequency | Forward/reverse read balance | Average quality† | Annotations | Coding region change | AA change   |
|------------|--------------------|------|-----------|--------|-------|----------|-----------|------------------------------|------------------|-------------|----------------------|-------------|
| chromosome | 460318             | SNV  | A         | G      | 198   | 198      | 100.00    | 0.32                         | 36.56            |             |                      |             |
| chromosome | 2659033            | SNV  | C         | G      | 249   | 249      | 100.00    | 0.43                         | 36.38            | G8E05_12575 | c.703C>G             | p.Leu235Val |
| chromosome | 2785098            | SNV  | C         | T      | 295   | 295      | 100.00    | 0.48                         | 36.58            |             |                      |             |
| chromosome | 3403699            | SNV  | C         | A      | 215   | 215      | 100.00    | 0.38                         | 36.30            | G8E05_16005 | c.1319G>T            | p.Gly440Val |
| chromosome | 3833247            | SNV  | A         | G      | 384   | 384      | 100.00    | 0.21                         | 36.26            | G8E05_18150 | c.198A>G             |             |

† Phred score

## Isolate ST32

- List of variants

| Mapping    | Reference Position | Type      | Reference | Allele | Count | Coverage | Frequency | Forward/reverse read balance | Average quality† | Annotations | Coding region change | AA change   |
|------------|--------------------|-----------|-----------|--------|-------|----------|-----------|------------------------------|------------------|-------------|----------------------|-------------|
| chromosome | 284635             | SNV       | G         | T      | 246   | 246      | 100.00    | 0.43                         | 36.63            | G8E05_01335 | c.862G>T             | p.Val288Leu |
| chromosome | 460318             | SNV       | A         | G      | 171   | 171      | 100.00    | 0.26                         | 36.31            |             |                      |             |
| chromosome | 2659033            | SNV       | C         | G      | 232   | 232      | 100.00    | 0.49                         | 36.35            | G8E05_12575 | c.703C>G             | p.Leu235Val |
| chromosome | 2785098            | SNV       | C         | T      | 170   | 171      | 99.42     | 0.41                         | 35.75            |             |                      |             |
| chromosome | 3316678            | Insertion | -         | T      | 273   | 283      | 96.47     | 0.38                         | 36.45            | G8E05_15670 | c.248dup             | p.Asn83fs   |
| chromosome | 3403699            | SNV       | C         | A      | 210   | 210      | 100.00    | 0.34                         | 36.33            | G8E05_16005 | c.1319G>T            | p.Gly440Val |
| chromosome | 3833247            | SNV       | A         | G      | 340   | 340      | 100.00    | 0.16                         | 35.95            | G8E05_18150 | c.198A>G             |             |

† Phred score

## Isolate ST33

- List of variants

| Mapping    | Reference Position | Type     | Reference | Allele | Count | Coverage | Frequency | Forward/reverse read balance | Average quality† | Annotations | Coding region change | AA change   |
|------------|--------------------|----------|-----------|--------|-------|----------|-----------|------------------------------|------------------|-------------|----------------------|-------------|
| chromosome | 460318             | SNV      | A         | G      | 148   | 148      | 100.00    | 0.32                         | 36.55            |             |                      |             |
| chromosome | 930531             | Deletion | A         | -      | 102   | 139      | 73.38     | 0.36                         | 35.44            | G8E05_04380 | c.1831delA           | p.Ile611fs  |
| chromosome | 2659033            | SNV      | C         | G      | 184   | 184      | 100.00    | 0.46                         | 36.20            | G8E05_12575 | c.703C>G             | p.Leu235Val |
| chromosome | 2785098            | SNV      | C         | T      | 154   | 154      | 100.00    | 0.48                         | 36.22            |             |                      |             |
| chromosome | 3403699            | SNV      | C         | A      | 142   | 142      | 100.00    | 0.23                         | 36.17            | G8E05_16005 | c.1319G>T            | p.Gly440Val |
| chromosome | 3407428 (#)        | Deletion | T         | -      | 154   | 164      | 93.90     | 0.42                         | 34.30            | G8E05_16025 | c.1043delA           | p.Asn348fs  |
| chromosome | 3833247            | SNV      | A         | G      | 357   | 357      | 100.00    | 0.21                         | 36.14            | G8E05_18150 | c.198A>G             |             |

(#) verified by Sanger sequencing, † Phred score

- Variant verified by Sanger sequencing

| Mapping    | Reference Position | Reference | Allele | PCR primers                                                                | Sanger sequencing results                   |
|------------|--------------------|-----------|--------|----------------------------------------------------------------------------|---------------------------------------------|
| chromosome | 3407428            | T         | -      | for, GGA TGT TAC GGA TAA TGT TAT TTC CT<br>rev, TGA TGG GAT GCC AAC AAT TT | <p>ACTTTCATTTAACAGTTCATATTTTTTTT-AACATC</p> |

## Isolate ST34

- List of variants

| Mapping    | Reference Position | Type      | Reference | Allele | Count | Coverage | Frequency | Forward/reverse read balance | Average quality† | Annotations | Coding region change | AA change   |
|------------|--------------------|-----------|-----------|--------|-------|----------|-----------|------------------------------|------------------|-------------|----------------------|-------------|
| chromosome | 48592              | SNV       | T         | C      | 325   | 327      | 99.39     | 0.15                         | 35.87            |             |                      |             |
| chromosome | 247748             | SNV       | G         | T      | 121   | 121      | 100.00    | 0.45                         | 35.46            | G8E05_01200 | c.3375G>T            |             |
| chromosome | 460318             | SNV       | A         | G      | 163   | 163      | 100.00    | 0.29                         | 36.41            |             |                      |             |
| chromosome | 835081             | SNV       | T         | C      | 153   | 153      | 100.00    | 0.49                         | 35.46            |             |                      |             |
| chromosome | 993298 (#)         | SNV       | C         | T      | 291   | 292      | 99.66     | 0.41                         | 35.91            | flhA        | c.979C>T             | p.Gln327*   |
| chromosome | 1385000            | Deletion  | T         | -      | 222   | 237      | 93.67     | 0.18                         | 33.20            | G8E05_06775 | c.241delA            | p.Ile81fs   |
| chromosome | 1509665            | SNV       | A         | G      | 102   | 102      | 100.00    | 0.24                         | 36.14            | G8E05_07300 | c.603A>G             |             |
| chromosome | 1676949            | SNV       | T         | C      | 85    | 85       | 100.00    | 0.45                         | 35.07            | G8E05_08080 | c.245T>C             | p.Val82Ala  |
| chromosome | 1814301 (#)        | SNV       | G         | C      | 170   | 171      | 99.42     | 0.40                         | 36.00            | spo0A       | c.690G>C             | p.Trp230Cys |
| chromosome | 2659033            | SNV       | C         | G      | 166   | 166      | 100.00    | 0.42                         | 36.22            | G8E05_12575 | c.703C>G             | p.Leu235Val |
| chromosome | 2785098            | SNV       | C         | T      | 271   | 271      | 100.00    | 0.45                         | 35.77            |             |                      |             |
| chromosome | 3403699            | SNV       | C         | A      | 63    | 63       | 100.00    | 0.37                         | 36.62            | G8E05_16005 | c.1319G>T            | p.Gly440Val |
| chromosome | 3406863 (#)        | Insertion | -         | A      | 59    | 67       | 88.06     | 0.37                         | 36.39            | G8E05_16025 | c.1608dup            | p.Gln537fs  |
| chromosome | 3833247            | SNV       | A         | G      | 236   | 236      | 100.00    | 0.17                         | 35.92            | G8E05_18150 | c.198A>G             |             |

(#) verified by Sanger sequencing, † Phred score

- Variants verified by Sanger sequencing

| Mapping    | Reference Position | Reference | Allele | PCR primers                                                              | Sanger sequencing results                         |
|------------|--------------------|-----------|--------|--------------------------------------------------------------------------|---------------------------------------------------|
| chromosome | 993298             | C         | T      | for, CAA TTA ACA GGA TTC CCA AAG G<br>rev, CCC ATC TCA ATA GCA CAT TGT C | <p>AAGAAAAGAACAGGTTATTATGTAAGAAGAAGCTCAGCAAAT</p> |

|            |         |   |   |                                                                       |                                                                   |
|------------|---------|---|---|-----------------------------------------------------------------------|-------------------------------------------------------------------|
| chromosome | 1814301 | G | C | for, GAC CAG TAG TAA TGC CGG AAA<br>rev, AAG CGA ACT GGT CAC AAA CC   | <p>TATAAGACACGCTATAGAAGTAGCTTGC<sup>T</sup>CAAGAGGTCAAGTT</p>     |
| chromosome | 3406863 | - | A | for, CCT GCT TCT CAC AAA CTA CAG C<br>rev, TCC GTA ACA TCC TAC GCT GA | <p>TCTTTAAAGTTTTATCCACTTGAAAAAA<sup>A</sup>TCTTTCAAATATGGATTC</p> |

## Isolate ST39

- List of variants

| Mapping    | Reference Position | Type      | Reference | Allele | Count | Coverage | Frequency | Forward/reverse read balance | Average quality† | Annotations | Coding region change | AA change   |
|------------|--------------------|-----------|-----------|--------|-------|----------|-----------|------------------------------|------------------|-------------|----------------------|-------------|
| chromosome | 127629             | Deletion  | A         | -      | 133   | 167      | 79.64     | 0.38                         | 34.75            | G8E05_00715 | c.774delA            | p.Lys258fs  |
| chromosome | 460318             | SNV       | A         | G      | 98    | 98       | 100.00    | 0.33                         | 36.27            |             |                      |             |
| chromosome | 900532 (#)         | Insertion | -         | A      | 176   | 178      | 98.88     | 0.50                         | 36.47            | G8E05_04245 | c.6dup               | p.Glu3fs    |
| chromosome | 1035690            | SNV       | A         | C      | 170   | 170      | 100.00    | 0.31                         | 36.59            | G8E05_04900 | c.19A>C              | p.Lys7Gln   |
| chromosome | 1232296            | SNV       | G         | A      | 150   | 151      | 99.34     | 0.45                         | 36.21            | G8E05_05835 | c.336G>A             |             |
| chromosome | 1687160            | SNV       | C         | T      | 135   | 141      | 95.74     | 0.31                         | 36.21            | G8E05_08120 | c.583G>A             | p.Ala195Thr |
| chromosome | 2659033            | SNV       | C         | G      | 315   | 315      | 100.00    | 0.50                         | 36.52            | G8E05_12575 | c.703C>G             | p.Leu235Val |
| chromosome | 2785098            | SNV       | C         | T      | 195   | 195      | 100.00    | 0.48                         | 36.19            |             |                      |             |
| chromosome | 3403699            | SNV       | C         | A      | 139   | 139      | 100.00    | 0.37                         | 36.47            | G8E05_16005 | c.1319G>T            | p.Gly440Val |
| chromosome | 3406111 (#)        | Deletion  | A         | -      | 95    | 112      | 84.82     | 0.26                         | 34.52            | G8E05_16020 | c.284delT            | p.Leu95fs   |
| chromosome | 3540160            | SNV       | C         | T      | 147   | 147      | 100.00    | 0.39                         | 36.66            | G8E05_16640 | c.3G>A               | p.Met1?     |
| chromosome | 3833247            | SNV       | A         | G      | 197   | 197      | 100.00    | 0.21                         | 35.73            | G8E05_18150 | c.198A>G             |             |

(#) verified by Sanger sequencing, † Phred score

- Variants verified by Sanger sequencing

| Mapping    | Reference Position | Reference | Allele | PCR primers                                                                | Sanger sequencing results                        |
|------------|--------------------|-----------|--------|----------------------------------------------------------------------------|--------------------------------------------------|
| chromosome | 900532             | -         | A      | for, TGA AGG TAA ATG GAG TAG GTA TAA CA<br>rev, GAT TGC GTC TAG CCA TTT CC | <p>AATATTAAGGAGAATTTTAAATGGAAAGAAAAAATAAAACA</p> |

|            |         |   |   |                                                                             |                                                                                     |
|------------|---------|---|---|-----------------------------------------------------------------------------|-------------------------------------------------------------------------------------|
| chromosome | 3406111 | A | - | for, TAC TGC GAA AGC ACC ATA CG<br>rev, GCA TTT AGC AAT AGT AAG ATA AGC AAA | 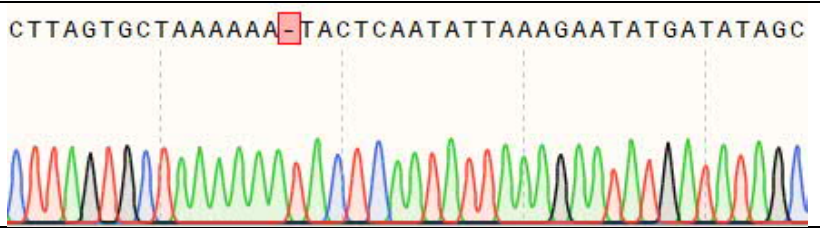 |
|------------|---------|---|---|-----------------------------------------------------------------------------|-------------------------------------------------------------------------------------|

## Isolate ST40

- List of variants

| Mapping    | Reference Position | Type      | Reference | Allele | Count | Coverage | Frequency | Forward/reverse read balance | Average quality† | Annotations | Coding region change | AA change   |
|------------|--------------------|-----------|-----------|--------|-------|----------|-----------|------------------------------|------------------|-------------|----------------------|-------------|
| chromosome | 460318             | SNV       | A         | G      | 100   | 100      | 100.00    | 0.32                         | 36.38            |             |                      |             |
| chromosome | 900532 (#)         | Insertion | -         | A      | 134   | 136      | 98.53     | 0.47                         | 36.55            | G8E05_04245 | c.6dup               | p.Glu3fs    |
| chromosome | 2380101            | SNV       | C         | T      | 121   | 121      | 100.00    | 0.44                         | 35.81            | G8E05_11315 | c.21G>A              |             |
| chromosome | 2659033            | SNV       | C         | G      | 285   | 285      | 100.00    | 0.49                         | 36.40            | G8E05_12575 | c.703C>G             | p.Leu235Val |
| chromosome | 2785098            | SNV       | C         | T      | 131   | 131      | 100.00    | 0.40                         | 35.99            |             |                      |             |
| chromosome | 3403699            | SNV       | C         | A      | 130   | 130      | 100.00    | 0.35                         | 35.65            | G8E05_16005 | c.1319G>T            | p.Gly440Val |
| chromosome | 3406111 (#)        | Deletion  | A         | -      | 108   | 123      | 87.80     | 0.19                         | 35.60            | G8E05_16020 | c.284delT            | p.Leu95fs   |
| chromosome | 3540160            | SNV       | C         | T      | 143   | 143      | 100.00    | 0.46                         | 36.23            | G8E05_16640 | c.3G>A               | p.Met1?     |
| chromosome | 3833247            | SNV       | A         | G      | 471   | 471      | 100.00    | 0.18                         | 36.17            | G8E05_18150 | c.198A>G             |             |

(#) verified by Sanger sequencing, † Phred score

- Variants verified by Sanger sequencing

| Mapping    | Reference Position | Reference | Allele | PCR primers                                                                 | Sanger sequencing results                                                                                                                  |
|------------|--------------------|-----------|--------|-----------------------------------------------------------------------------|--------------------------------------------------------------------------------------------------------------------------------------------|
| chromosome | 900532             | -         | A      | for, TGA AGG TAA ATG GAG TAG GTA TAA CA<br>rev, GAT TGC GTC TAG CCA TTT CC  | <p>TAATATTAAGGAGAATTTTAAATGGAAAGAAAAAATAAAAC</p> 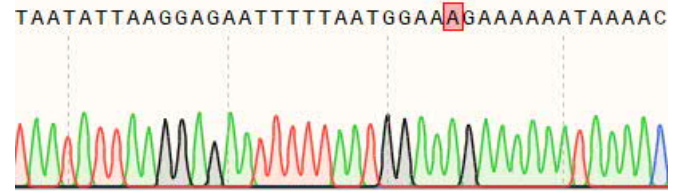      |
| chromosome | 3406111            | A         | -      | for, TAC TGC GAA AGC ACC ATA CG<br>rev, GCA TTT AGC AAT AGT AAG ATA AGC AAA | <p>ACTTAGTGCTAAAAA-TACTCAATATTAAGAATATGATATAGCCT</p>  |



## Isolate ST41

- List of variants

| Mapping    | Reference Position | Type | Reference | Allele | Count | Coverage | Frequency | Forward/reverse read balance | Average quality† | Annotations | Coding region change | AA change   |
|------------|--------------------|------|-----------|--------|-------|----------|-----------|------------------------------|------------------|-------------|----------------------|-------------|
| chromosome | 57420              | SNV  | G         | A      | 260   | 260      | 100.00    | 0.45                         | 36.25            | rpmD        | c.1G>A               | p.Val1Met   |
| chromosome | 460318             | SNV  | A         | G      | 116   | 116      | 100.00    | 0.25                         | 36.81            |             |                      |             |
| chromosome | 2659033            | SNV  | C         | G      | 234   | 235      | 99.57     | 0.44                         | 36.15            | G8E05_12575 | c.703C>G             | p.Leu235Val |
| chromosome | 2785098            | SNV  | C         | T      | 252   | 252      | 100.00    | 0.43                         | 36.13            |             |                      |             |
| chromosome | 3403699            | SNV  | C         | A      | 139   | 139      | 100.00    | 0.37                         | 36.12            | G8E05_16005 | c.1319G>T            | p.Gly440Val |
| chromosome | 3405031            | SNV  | C         | T      | 118   | 118      | 100.00    | 0.33                         | 35.93            |             |                      |             |
| chromosome | 3833247            | SNV  | A         | G      | 276   | 276      | 100.00    | 0.15                         | 36.31            | G8E05_18150 | c.198A>G             |             |

† Phred score

## Isolate ST43

- List of variants

| Mapping    | Reference Position | Type      | Reference | Allele | Count | Coverage | Frequency | Forward/reverse read balance | Average quality† | Annotations | Coding region change | AA change   |
|------------|--------------------|-----------|-----------|--------|-------|----------|-----------|------------------------------|------------------|-------------|----------------------|-------------|
| chromosome | 460318             | SNV       | A         | G      | 111   | 111      | 100.00    | 0.37                         | 36.50            |             |                      |             |
| chromosome | 561576             | SNV       | G         | C      | 283   | 283      | 100.00    | 0.47                         | 36.39            | G8E05_02745 | c.805G>C             | p.Val269Leu |
| chromosome | 900532 (#)         | Insertion | -         | A      | 256   | 259      | 98.84     | 0.43                         | 36.32            | G8E05_04245 | c.6dup               | p.Glu3fs    |
| chromosome | 2128304            | SNV       | T         | G      | 104   | 104      | 100.00    | 0.39                         | 36.37            | G8E05_10110 | c.31A>C              | p.Lys11Gln  |
| chromosome | 2659033            | SNV       | C         | G      | 230   | 230      | 100.00    | 0.50                         | 36.43            | G8E05_12575 | c.703C>G             | p.Leu235Val |
| chromosome | 2783238            | SNV       | A         | C      | 227   | 229      | 99.13     | 0.27                         | 35.96            |             |                      |             |
| chromosome | 2785098            | SNV       | C         | T      | 248   | 248      | 100.00    | 0.49                         | 35.99            |             |                      |             |
| chromosome | 3403699            | SNV       | C         | A      | 108   | 108      | 100.00    | 0.35                         | 36.48            | G8E05_16005 | c.1319G>T            | p.Gly440Val |
| chromosome | 3406111 (#)        | Deletion  | A         | -      | 49    | 56       | 87.50     | 0.24                         | 35.00            | G8E05_16020 | c.284delT            | p.Leu95fs   |
| chromosome | 3540160            | SNV       | C         | T      | 225   | 225      | 100.00    | 0.40                         | 36.59            | G8E05_16640 | c.3G>A               | p.Met1?     |
| chromosome | 3833093            | SNV       | C         | T      | 192   | 192      | 100.00    | 0.41                         | 36.30            | G8E05_18150 | c.44C>T              | p.Thr15Ile  |
| chromosome | 3833247            | SNV       | A         | G      | 230   | 230      | 100.00    | 0.14                         | 35.67            | G8E05_18150 | c.198A>G             |             |

(#) verified by Sanger sequencing, † Phred score

- Variants verified by Sanger sequencing

| Mapping    | Reference Position | Reference | Allele | PCR primers                                                                 | Sanger sequencing results                           |
|------------|--------------------|-----------|--------|-----------------------------------------------------------------------------|-----------------------------------------------------|
| chromosome | 900532             | -         | A      | for, TGA AGG TAA ATG GAG TAG GTA TAA CA<br>rev, GAT TGC GTC TAG CCA TTT CC  | <p>TAATATTAAGGAGAATTTTTAATGGAAAGAAAAATAAAACAA</p>   |
| chromosome | 3406111            | A         | -      | for, TAC TGC GAA AGC ACC ATA CG<br>rev, GCA TTT AGC AAT AGT AAG ATA AGC AAA | <p>ACTTAGTGCTAAAAA-TACTCAATATTAAGAATATGATATAGCC</p> |

## Isolate ST44

- List of variants

| Mapping    | Reference Position | Type      | Reference | Allele | Count | Coverage | Frequency | Forward/reverse read balance | Average quality† | Annotations | Coding region change | AA change   |
|------------|--------------------|-----------|-----------|--------|-------|----------|-----------|------------------------------|------------------|-------------|----------------------|-------------|
| chromosome | 460318             | SNV       | A         | G      | 181   | 181      | 100.00    | 0.28                         | 36.01            |             |                      |             |
| chromosome | 900532 (#)         | Insertion | -         | A      | 188   | 191      | 98.43     | 0.42                         | 36.10            | G8E05_04245 | c.6dup               | p.Glu3fs    |
| chromosome | 1684890 (#)        | SNV       | G         | A      | 128   | 132      | 96.97     | 0.38                         | 35.58            | treP        | c.809C>T             | p.Pro270Leu |
| chromosome | 2659033            | SNV       | C         | G      | 152   | 152      | 100.00    | 0.49                         | 36.08            | G8E05_12575 | c.703C>G             | p.Leu235Val |
| chromosome | 2785098            | SNV       | C         | T      | 233   | 234      | 99.57     | 0.50                         | 35.99            |             |                      |             |
| chromosome | 3312248            | SNV       | A         | G      | 221   | 221      | 100.00    | 0.35                         | 35.92            | clpB        | c.377T>C             | p.Val126Ala |
| chromosome | 3403699            | SNV       | C         | A      | 105   | 105      | 100.00    | 0.48                         | 35.97            | G8E05_16005 | c.1319G>T            | p.Gly440Val |
| chromosome | 3406111 (#)        | Deletion  | A         | -      | 61    | 66       | 92.42     | 0.15                         | 35.05            | G8E05_16020 | c.284delT            | p.Leu95fs   |
| chromosome | 3540160            | SNV       | C         | T      | 237   | 237      | 100.00    | 0.42                         | 36.27            | G8E05_16640 | c.3G>A               | p.Met1?     |
| chromosome | 3797980            | SNV       | C         | A      | 202   | 202      | 100.00    | 0.35                         | 36.31            | mnmA        | c.1344C>A            | p.Asn448Lys |
| chromosome | 3833247            | SNV       | A         | G      | 198   | 198      | 100.00    | 0.16                         | 35.44            | G8E05_18150 | c.198A>G             |             |

(#) verified by Sanger sequencing, † Phred score

| Mapping    | Region          | Type     | Reference    | Allele | Length | Evidence          | Variant ratio | Sequence complexity |
|------------|-----------------|----------|--------------|--------|--------|-------------------|---------------|---------------------|
| chromosome | 3147761-3147772 | Deletion | TTTTATAGCATT | -      | 12     | Paired breakpoint | 0.994083      | 0.583333            |

Deletion was confirmed by performing de novo assembly of ST44 read sequencing and sequence alignment of the region encompassing the deletion with ST7B reference genome sequence.

- Variants verified by Sanger sequencing

| Mapping    | Reference Position | Reference | Allele | PCR primers                                                                | Sanger sequencing results                      |
|------------|--------------------|-----------|--------|----------------------------------------------------------------------------|------------------------------------------------|
| chromosome | 900532             | -         | A      | for, TGA AGG TAA ATG GAG TAG GTA TAA CA<br>rev, GAT TGC GTC TAG CCA TTT CC | <p>TATTAAGGAGAATTTTTAATGGAAAGAAAAATAAAACAA</p> |

|            |         |   |   |                                                                             |  |
|------------|---------|---|---|-----------------------------------------------------------------------------|--|
| chromosome | 1684890 | G | A | for, TTC CAC CAA GTT CAG CCA TT<br>rev, AAG ATG GGC ACC ACA CAA AT          |  |
| chromosome | 3406111 | A | - | for, TAC TGC GAA AGC ACC ATA CG<br>rev, GCA TTT AGC AAT AGT AAG ATA AGC AAA |  |

- *Stability of SNP at position 1684890 (TreP, PTS system trehalose-specific component) after 10 consecutive subculturings in TPGY (rich medium) in laboratory conditions*

ST44 was consecutively sub-cultured 10 times in TPGY broth in laboratory conditions. Using the same primer pair as indicated above, we amplified the region encompassing the TreP SNP and sent it for Sanger sequencing. We observed that the population carrying G at position 1684890 become dominant, as opposed to what we observed in the original Sanger sequencing (see above), where the whole population harboured A.

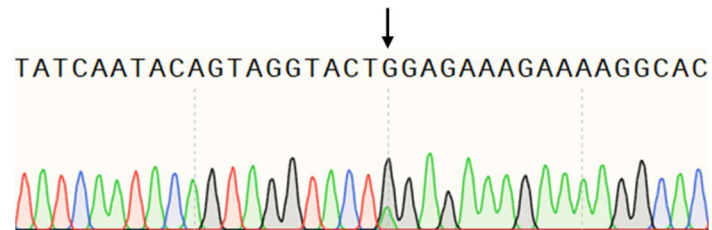

Supplement: mbio.02384-21-s0001.pdf [file mbio.02384-21-s0001.pdf]
