# Supplementary material for: Genomic and Phenotypic Characterization of Clostridium botulinum Isolates from an Infant Botulism Case Suggests Adaptation Signatures to the Gut
Source: PubMed Central journal article supplement (PMC9239077; doi:10.1128/mbio.02384-21), 2022-05-02
Supplement: mbio.02384-21-s0007.pdf [file mbio.02384-21-s0007.pdf]

Table S1. BLAST search results for *Clostridium botulinum* plasmid pST7B against NCBI whole-genome shotgun contig (wgs) database. The query cover corresponds to the percentage of pST7B plasmid sequence aligned to the corresponding match. Hits were ordered based on query cover and percentage identity.

| Accession number <sup>a</sup> | Bacterial species    | Strain name           | Contig name           | Source                                           | Toxin type | Total score | Query Cover | E value | Percentage Identity |
|-------------------------------|----------------------|-----------------------|-----------------------|--------------------------------------------------|------------|-------------|-------------|---------|---------------------|
| ABDP01000035.1                | <i>C. botulinum</i>  | Bf                    | gcontig_1105471839388 | infant botulism case                             | B5F2       | 27105       | 100 %       | 0       | 99.83 %             |
| SGJI01000030.1                | <i>C. botulinum</i>  | F2534/89              | contig00030           | food-borne botulism                              | B5F2       | 25530       | 100 %       | 0       | 99.85 %             |
| SGKF01000060.1                | <i>C. botulinum</i>  | H130580885            | contig00060           | infant botulism case                             | B5F2       | 25524       | 100 %       | 0       | 99.84 %             |
| AQPU01000117.1 <sup>a</sup>   | <i>C. botulinum</i>  | CDC297                | CFSAN002368_113       | -                                                | A1         | 17631       | 100 %       | 0       | 99.71 %             |
| AQPU01000157.1 <sup>a</sup>   | <i>C. botulinum</i>  | CDC297                | CFSAN002368_175       | -                                                | A1         | -           | -           | -       | -                   |
| LFON01000064.1                | <i>C. botulinum</i>  | An436                 | 10258_64              | infant botulism case                             | B5F2       | 25449       | 100 %       | 0       | 99.86 %             |
| QVAH01000178.1                | <i>C. botulinum</i>  | CDC69057              | NODE_96               | infant botulism case                             | B5F2       | 25221       | 100 %       | 0       | 99.49 %             |
| SGNM01000073.1                | <i>C. botulinum</i>  | H134990001            | contig00073           | infant botulism case                             | B5F2       | 25524       | 100 %       | 0       | 99.94 %             |
| SWXE01000050.1                | <i>C. botulinum</i>  | IFR 18/152            | contig00050           | unknown, non-toxic                               | -          | 16058       | 81 %        | 0       | 91.34 %             |
| SXFK01000053.1                | <i>C. botulinum</i>  | IFR 18/071            | contig00053           | unknown, non-toxic                               | -          | 16054       | 81 %        | 0       | 90.62 %             |
| SXDR01000053.1                | <i>C. botulinum</i>  | IFR 18/092            | contig00053           | unknown, non-toxic                               | -          | 16001       | 81 %        | 0       | 90.62 %             |
| SXDG01000068.1                | <i>C. botulinum</i>  | IFR 18/099            | contig00068           | unknown, non-toxic                               | -          | 16001       | 81 %        | 0       | 90.62 %             |
| SWXG01000041.1                | <i>C. botulinum</i>  | IFR 18/150            | contig00041           | unknown, non-toxic                               | -          | 15900       | 81 %        | 0       | 90.62 %             |
| SWXF01000075.1                | <i>C. botulinum</i>  | IFR 18/151            | contig00075           | unknown, non-toxic                               | -          | 16001       | 81 %        | 0       | 90.62 %             |
| SWXD01000056.1                | <i>C. botulinum</i>  | IFR 18/153            | contig00056           | unknown, non-toxic                               | -          | 16001       | 81 %        | 0       | 90.62 %             |
| LLZT01000062.1                | <i>C. sporogenes</i> | PA 3679 (1961-4 VT95) | contig065             | spore crop isolate<br>Campbell's Soup<br>Company | -          | 16001       | 81 %        | 0       | 90.62 %             |
| LKKY02000035.1                | <i>C. sporogenes</i> | PA 3679 (Camp)        | plasmid unnamed1      | Company                                          | -          | 16001       | 81 %        | 0       | 90.62 %             |
| LJTA01000024.1                | <i>C. sporogenes</i> | PA 3679 (FDA VT91)    | contig024             | PA 3679<br>National Food<br>Laboratory           | -          | 16198       | 81 %        | 0       | 90.62 %             |
| LJSZ01000012.1                | <i>C. sporogenes</i> | PA 3679 (NFL VT28)    | contig012             | Laboratory<br>EA Johnson                         | -          | 16174       | 81 %        | 0       | 90.62 %             |
| LFVV01000039.1                | <i>C. sporogenes</i> | PA 3679 (UW)          | contig_40             | Laboratory (UW)                                  | -          | 16001       | 81 %        | 0       | 90.62 %             |
| SWXE01000050.1                | <i>C. botulinum</i>  | IFR 18/152            | contig00050           | unknown, non-toxic                               | -          | 16058       | 81 %        | 0       | 91.34 %             |

<sup>a</sup> The plasmid present in CDC297 (CFSAN002368 assembly) was split into two contigs.
