# Supplementary material for: Genomic and Phenotypic Characterization of Clostridium botulinum Isolates from an Infant Botulism Case Suggests Adaptation Signatures to the Gut
Source: PubMed Central journal article supplement (PMC9239077; doi:10.1128/mbio.02384-21), 2022-05-02
Supplement: mbio.02384-21-s0008.pdf [file mbio.02384-21-s0008.pdf]

Table S3. Colony morphotype and motility phenotype of all *Clostridium botulinum* isolates.

| Isolate | Origin         | Colony morphotype | Motility <sup>a</sup> | Flagellar associated mutations |
|---------|----------------|-------------------|-----------------------|--------------------------------|
| H4      | household dust | smooth            | n.d.                  | none                           |
| H18     | household dust | smooth            | n.d.                  | none                           |
| V41     | household dust | smooth            | n.d.                  | none                           |
| V62     | household dust | smooth            | n.d.                  | none                           |
| V134    | household dust | smooth            | n.d.                  | none                           |
| V206    | household dust | smooth            | n.d.                  | none                           |
| V1      | household dust | smooth            | n.d.                  | none                           |
| V4      | household dust | smooth            | n.d.                  | none                           |
| V73     | household dust | smooth            | n.d.                  | none                           |
| ST25    | infant stool   | smooth            | n.d.                  | none                           |
| ST7B    | infant stool   | smooth            | +                     | none                           |
| ST19    | infant stool   | smooth            | +                     | FlaA (Gln255Lys)               |
| ST4     | infant stool   | smooth            | n.d.                  | none                           |
| ST7     | infant stool   | smooth            | n.d.                  | none                           |
| ST21    | infant stool   | smooth            | n.d.                  | none                           |
| ST29    | infant stool   | smooth            | n.d.                  | none                           |
| ST31    | infant stool   | smooth            | n.d.                  | none                           |
| ST32    | infant stool   | smooth            | n.d.                  | none                           |
| ST33    | infant stool   | smooth            | n.d.                  | none                           |
| ST34    | infant stool   | rough             | -                     | FlhA (Gln327*)                 |
| ST39    | infant stool   | rough             | +/-                   | FlgN (Glu3fs)                  |
| ST40    | infant stool   | rough             | +/-                   | FlgN (Glu3fs)                  |
| ST41    | infant stool   | smooth            | n.d.                  | none                           |
| ST43    | infant stool   | rough             | +/-                   | FlgN (Glu3fs)                  |
| ST44    | infant stool   | rough             | +/-                   | FlgN (Glu3fs)                  |

<sup>a</sup> +, motile; -, non-motile; +/-, reduced motility; n.d., not determined; \*, stop codon; fs, frame-shift mutation.
