# Supplementary material for: Genomic and Phenotypic Characterization of Clostridium botulinum Isolates from an Infant Botulism Case Suggests Adaptation Signatures to the Gut
Source: PubMed Central journal article supplement (PMC9239077; doi:10.1128/mbio.02384-21), 2022-05-02
Supplement: mbio.02384-21-s0009.pdf [file mbio.02384-21-s0009.pdf]

Table S4. Antibiotic susceptibility assay – determination of MIC ( $\mu\text{g/ml}$ ) in *Clostridium botulinum* isolates. For comparison, ST7B (reference early stool isolate) and ST41 (late stool isolate) were included along with ST25 (early stool isolate with *treP* variant) and ST44 (late stool isolate with *treP* variant). The table shows the minimum and maximum values recorded among replicates.

| Isolate | MX          | LE         | CI         |
|---------|-------------|------------|------------|
| ST7B    | 0.094-0.125 | 0.094-0.19 | 0.064-0.19 |
| ST25    | 0.125-0.19  | 0.125-0.25 | 0.125-.019 |
| ST41    | 0.125-0.19  | 0.125-0.19 | 0.064-0.25 |
| ST44    | 0.125-0.25  | 0.125-0.25 | 0.064-0.19 |

MX, moxifloxacin; LE, levofloxacin; and CI, ciprofloxacin.
